# Supplementary material for: CEPR2 phosphorylates and accelerates the degradation of PYR/PYLs in Arabidopsis
Source: PubMed Central journal article supplement — J Exp Bot. 2019 Jun 21;70(19):5457–69. doi: 10.1093/jxb/erz302 (PMC6793440; doi:10.1093/jxb/erz302), 2019-06-21
Supplement: erz302_suppl_supplementary_figures_s1-s9_table_s1.pdf [file erz302_suppl_supplementary_figures_s1-s9_table_s1.pdf]

## Supplementary Figure S1

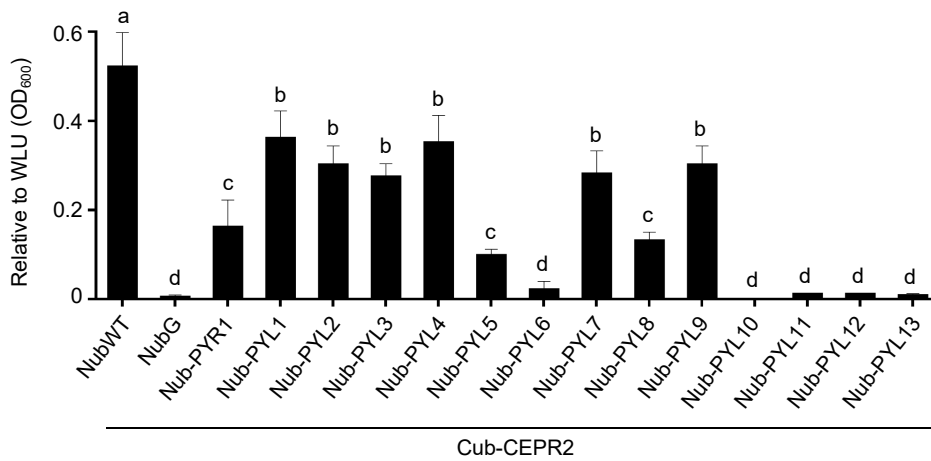

### Supplementary Figure S1. CEPR2 interacts with PYR/PYLs in yeast.

The interaction of CEPR2 with all PYLs were detected in yeast, and then the absorbance values of yeast cultured in -WLUAH liquid medium were measured by spectrophotometer at OD<sub>600</sub>. Three replicates were conducted. Error bars indicate SD ( $n = 18$ ),  $p < 0.05$ . One-way ANOVA Duncan's test was used for statistical analysis. Statistical differences are indicated by lowercase letters and different letters represent different significance. WLUAH: Trp, Leu, Ura, Ade and His.

## Supplementary Figure S2

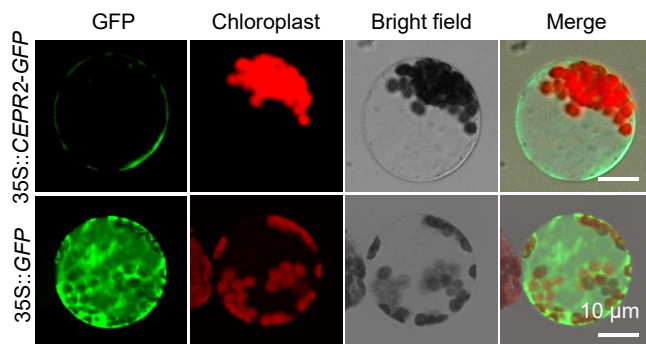

### Supplementary Figure S2. CEPR2 is localized in plasma membrane.

The GFP fluorescence of 35S::*CEPR2-GFP* transgenic protoplast was imaged by confocal microscopy at 488 nm. 35S::*GFP* was used as control.

## Supplementary Figure S3

**A**

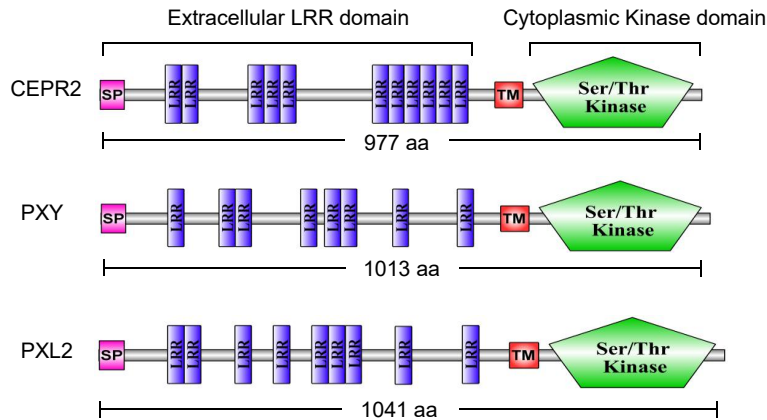

**B**

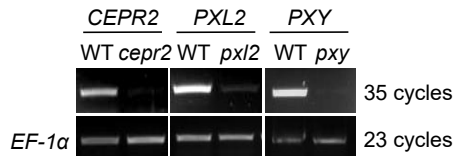

**C**

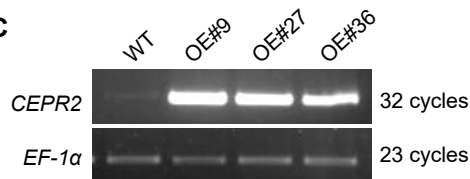

**D**

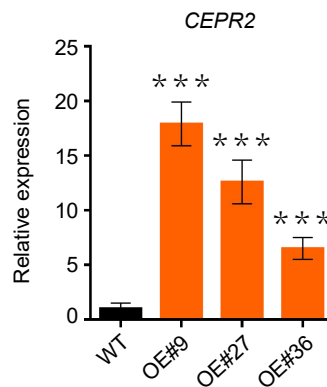

### Supplementary Figure S3. Identification of different mutants and *CEPR2*-OE lines.

(A) The protein structures of CEPR2, PXY and PXL2. SP, signal peptide; TM, transmembrane.

(B) Identification of the different T-DNA insertion mutants by RT-PCR.

(C and D) The expression levels of *CEPR2* in different OE lines were detected by RT-PCR and qRT-PCR. Error bars in (D) indicate SEM ( $N = 3$ ). \*\*\* $P < 0.001$  (Student's  $t$ -test).

## Supplementary Figure S4

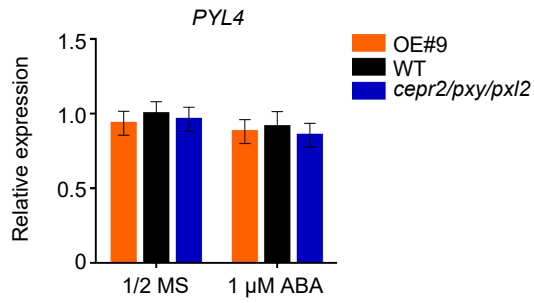

### Supplementary Figure S4. CEPR2 does not regulate the transcript levels of *PYL4*.

The expression levels of *PYL4* in OE#9, WT and *cepr2/pxy/pxl2* lines grown on 1/2 MS or 1 μM ABA for 7 d were analyzed by qRT-PCR.

### Supplementary Figure S5

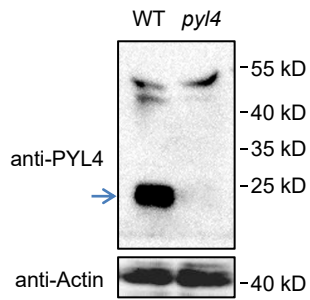

#### Supplementary Figure S5. Anti-PYL4 antibody can specifically recognize PYL4.

The specificity of anti-PYL4 provided by Dr. Xie was examined by western blot with 7-day-old seedlings of *pyl4* and WT grown on 1/2 MS.

Supplementary Figure S6

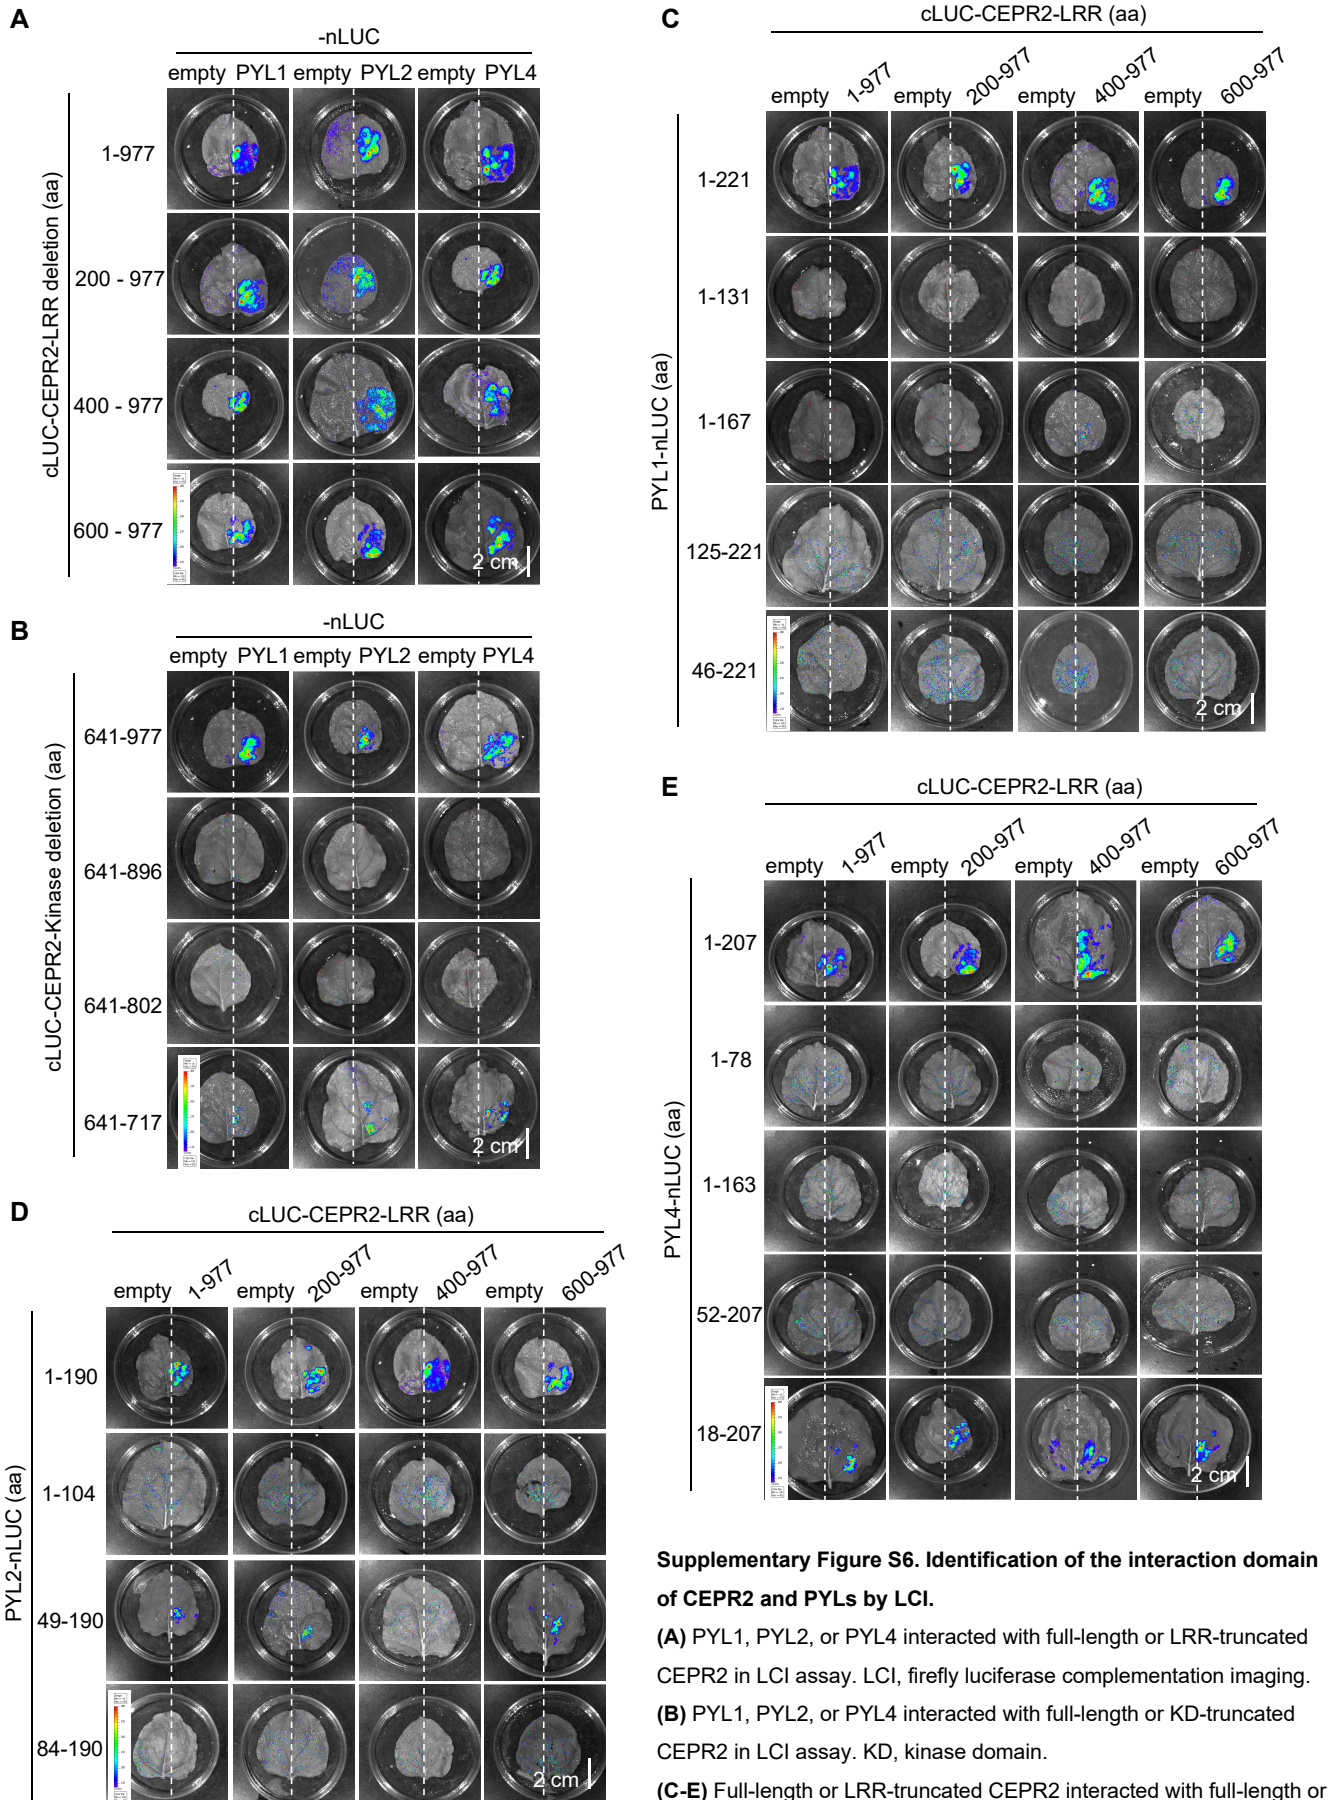

## Supplementary Figure S7

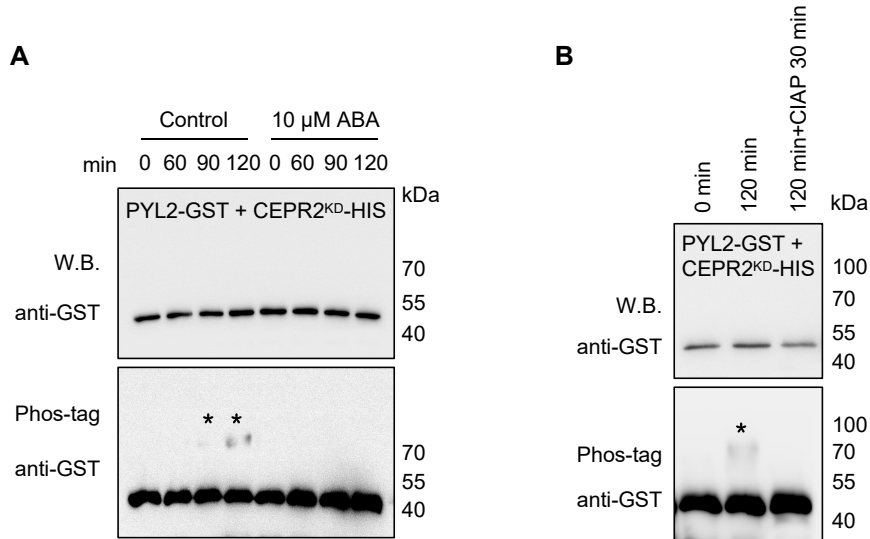

### Supplementary Figure S7. CEPR2 phosphorylates PYL2 *in vitro*.

**(A)** *In vitro* kinase assays showed that PYL2 was phosphorylated by CEPR2<sup>KD</sup>, while the phosphorylated PYL2 was disappeared under the ABA treatment condition. The W.B. assay was used to shown the loading control and un-phosphorylated PYL2. 50  $\mu$ M phos-tag was used to isolate the phosphorylated forms of PYL2 in this kinase assay. W.B., western blot.

**(B)** CIAP successfully removed the phosphoryl group of PYL2 in this kinase assay. CIAP, Calf Intestinal Alkaline Phosphatase.

## Supplementary Figure S8

### The phosphorylation mass spectrometry protocol

Protein digestion was performed using FASP method with modifications (*Nature Methods* 6, 359 - 362 (2009)). Briefly, 100 µg protein was dissolved with 50 mM ABC (NH<sub>4</sub>HCO<sub>3</sub>), reduced with DTT (dithiothreitol) at 56°C for 45 min, and alkylated with IAM (iodoacetamide) at room temperature for 30 min in the dark. The solution was transferred into a 10K ultrafiltration tube (Vivacon 500, Sartorius), centrifuged at 14,000 g for 20 min. 50 mM ABC solution was used to wash the protein for 3 times. 2 µg trypsin was added in 50 µL 50 mM ABC and incubated at 37°C overnight. The ultrafiltration tube was centrifuged at 14,000 g for 20 min with a new collection tube to collect digested peptides. ABC solution was added into the ultrafiltration tube to wash the digested peptide into the collection tube. The collected solution was diluted with 0.1% FA for nanoLC-MS analysis.

NanoLC separation was achieved with a Waters (Milford, MA, USA) nanoAcquity nanoHPLC. The trap column was Thermo Acclaim PepMap 100 (75 µm × 2 mm, C18, 3 µm). The analytical column was homemade with 100 µm I.D. fused silica capillary (Polymicro) filled with 20 cm of C18 stationary phase (Phenomenex, Aqua 3 µm C18 125A). A gradient elution program was used, with mobile phase increases linearly from 1% B to 35% B in 65 min. Mobile phase A: 0.1% FA in water, B: 0.1% FA in acetonitrile.

Nanospray ESI-MS was performed on a Thermo Q-Exactive high resolution mass spectrometer (Thermo, Waltham, MA, USA) with 70,000 MS scan resolution and 17,500 MS/MS scan resolution and top-10 MS/MS selection.

Raw data from the mass spectrometer were preprocessed with Mascot Distiller 2.4 for peak picking. The resulted peak lists were searched against database using Mascot 2.5 search engine. The search parameters are: Fixed modifications: Carbamidomethyl (C), Variable modifications: Oxidation (M) and Phosphorylation (S, T, Y). Enzyme: Trypsin, Maximum missed cleavages: 2, MS mass tolerance: 10 ppm, MSMS mass tolerance: 0.02 Da. Scaffold PTM was used to evaluate phosphorylation sites of the Mascot search results using Ascore algorithm.

### Protein View: AT2G38310.1

| Symbols: **PYL4, RCAR10** | **PYR1-like 4** | chr2:16050251-16050874 FORWARD LENGTH=207

**Database:** TAIR10  
**Score:** 34253  
**Nominal mass (M<sub>r</sub>):** 22706  
**Calculated pI:** 6.43

Sequence similarity is available as [an NCBI BLAST search of AT2G38310.1 against nr.](#)

#### Search parameters

**MS data file:** G:\UserData\Public\Data\2018\201803\20180328-Q1\shandong-4.raw  
**Enzyme:** Trypsin: cuts C-term side of KR unless next residue is P.  
**Fixed modifications:** Carbamidomethyl (C)  
**Variable modifications:** Oxidation (M), Phospho (ST), Phospho (Y)

#### Protein sequence coverage: 98%

Matched peptides shown in **bold red**.

1 **MLAVHRPSSA VSDGDSVQIP MMIASFQKR PSLSRDSTAA RFHTHEVGPN**  
51 **QCCSAVIQEI SAPISTVWSV VRRFDNPQAY KHFLKSCSVI GGDGDNVGS**  
101 **RQVHVVSGLP AASSTERLDI LDDERHVISF SVVGGDHRLS NYRSVTTLHP**  
151 **SPISGTVVVE SYVVDVPPGN TKEETCDFVD VIVRCNLQSL AKIAENTA**  
201 **SKK**KMSL

| Query                 | Start - End | Observed  | Mr (expt) | Mr (calc) | ppm  | M | Score | Expect   | Rank | U | Peptide                                                     |
|-----------------------|-------------|-----------|-----------|-----------|------|---|-------|----------|------|---|-------------------------------------------------------------|
| <a href="#">30199</a> | 42 - 72     | 1196.9181 | 3587.7325 | 3587.6691 | 17.7 | 0 | 66    | 6e-007   | 1    | U | R.FHTHEVGPN <b>QCCSAVIQEISAPISTVWSVVR</b> .R + Phospho (ST) |
| <a href="#">12258</a> | 82 - 101    | 733.6701  | 2197.9885 | 2196.9987 | 450  | 1 | 47    | 4.5e-005 | 1    | U | K.HFLKSCSV <b>IGGDGDNVGS</b> LR.Q + Phospho (ST)            |
| <a href="#">22569</a> | 82 - 101    | 550.5055  | 2197.9928 | 2196.9987 | 452  | 1 | 19    | 0.017    | 1    | U | K.HFLKSCSV <b>IGGDGDNVGS</b> LR.Q + Phospho (ST)            |

The final result,  
the phosphorylation sites are marked in red

**54**

MLAVHRPSSAVSDGDSVQIPMMIASFQKR**F**PSLSRDSTAA**R**FHTHEVGPN**QCCSA**VIQEISAPISTVWSVRRFDNPQA  
**86 88**  
PYL4 YKHFLK**SCS**VIGGDGDNVGS**L**RQVHVVSGLPAASSTERLDILDDERHVISFSVVGGDHRLSNYRSVTTLHPSPISGTVV  
ESYVVDVPPGN**T**K**E**ETCDFVDVIVRCNLQSLAKIAENTA**ES**KKKMSL

### Supplementary Figure S8. Identification of the phosphorylation sites of PYL4 in phosphorylation mass spectrometry.

The protein samples incubated in kinase buffer for 1 h were separated by SDS-PAGE to isolate the phosphorylated PYL4. Subsequently, the target proteins were cut and analyzed by phosphorylation mass spectrometry, three putative phosphorylation sites, S54, S86 and S88, were finally identified.



### Supplementary Figure S9

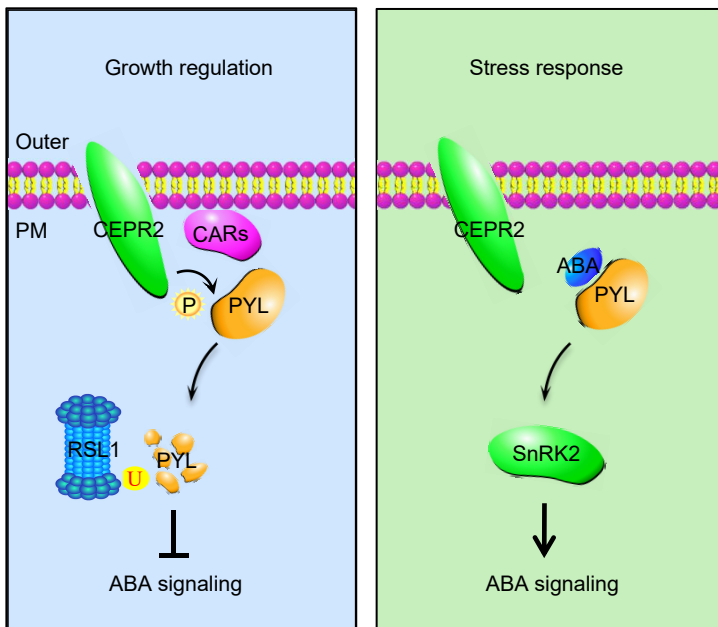

**Supplementary Figure S9. CEPR2-mediated phosphorylation optimizes the balance of growth regulation and stress response in Arabidopsis.**

The phosphorylation of PYR/PYLs by CEPR2 promotes the ubiquitination of PYR/PYLs by RSL1, resulting in the repressed ABA signaling. However, ABA-bound PYLs successfully prevent this process and activate ABA signaling during times of stress. Taken together, plants utilize this phospho-regulatory mechanism to optimize the balance of growth and stress responses.

**Supplementary Table S1. Primers used in this study**

| Purpose      | Name                          | Sequence (5'-3')                                                   |
|--------------|-------------------------------|--------------------------------------------------------------------|
| Co-IP        | CEPR2-LRR F                   | TCTAGAAATGACCGTTGAGAAACAAGCTCT                                     |
|              | CEPR2-LRR R                   | CTCGAGTGTTCATCGAGTGAACCTATTCCTC                                    |
|              | CEPR2-KD F                    | CTCGAGCGTTACAGAGTTGTGAAGATACGTG                                    |
|              | CEPR2-KD R                    | GGTACCTACTGTAATCTTTCCAGTTGTGTC                                     |
|              | CEPR2-FL F                    | GGTACCATGACCGTTGAGAAACAAGCTCT                                      |
|              | CEPR2-FL R                    | CCCGGGTACTGTAATCTTTCCAGTTGTGTC                                     |
|              | RSL1 F                        | CACCATGGAGGAAGATGACCTAAACCC                                        |
|              | RSL1 R                        | ACAGCAGCACGAACCAACATT                                              |
|              | CAR4 F                        | CACCTAAAGGAAATGACAACGGCGTGTGTC                                     |
|              | CAR4 R                        | TAGACCCTTGGAGCCAGGGA                                               |
|              | PYL2 F                        | CACCATGAGCTCATCCCCGGCC                                             |
|              | PYL2 R                        | TTCATCATCATGCATAGGTGCAGATG                                         |
|              | PYL4 F                        | CACCATGCTTGCCGTTACCCTG                                             |
|              | PYL4 R                        | CAGAGACATCTTCTTCTGTCTCT                                            |
| BIFC         | YFP <sup>c</sup> -PYL1 F      | CACCATGGCGAATTCAGAGTCCTC                                           |
|              | YFP <sup>c</sup> -PYL1 R      | CCTAACCTGAGAAGAGTTGTTG                                             |
|              | YFP <sup>c</sup> -PYL4 F      | CACCATGCTTGCCGTTACCCTG                                             |
|              | YFP <sup>c</sup> -PYL4 R      | CAGAGACATCTTCTTCTGTCTCT                                            |
|              | YFP <sup>c</sup> -PYL9 F      | CACCATGATGGACGGCGTTGAAG                                            |
|              | YFP <sup>c</sup> -PYL9 R      | CTGAGTAATGTCTCTGAGAAGCC                                            |
|              | YFP <sup>n</sup> -CEPR2 F     | CACCATGTGCGAGAAGACCAGACC                                           |
|              | YFP <sup>n</sup> -CEPR2 R     | TACTGTAATCTTTCCAGTTGTGTC                                           |
| LCI          | clUC-CAR4 F                   | GGTACCATGACAACGGCGTGTCCG                                           |
|              | clUC-CAR4 R                   | CTGCGAGTCATAGACCCTTGGAGCCAG                                        |
|              | clUC-PYL2 F                   | GGTACCATGAGCTCATCCCCGGCC                                           |
|              | clUC-PYL2 R                   | GTCGACTTATTCATCATCATGCATAGGTGCAG                                   |
|              | clUC-PYL4 F                   | GGTACCATGCTTGCCGTTACCCTG                                           |
|              | clUC-PYL4 R                   | GTCGACTCACAGAGACATCTTCTTCTGTCTC                                    |
|              | clUC-RSL1 F                   | GGTACCATGGAGGAAGATGACCTAAACCC                                      |
|              | clUC-RSL1 R                   | GTCGACTTACGAGAACCCTTACGAGT                                         |
|              | nLUC-RSL1 F                   | GGTACCATGGAGGAAGATGACCTAAACCC                                      |
|              | nLUC-RSL1 R                   | GTCGACCGAGAACCCTTACGAGT                                            |
|              | nLUC-CEPR2 F                  | GGTACCATGTGCGAGAAGACCAGACCTC                                       |
| nLUC-CEPR2 R | GTCGACACTGTAATCTTTCCAGTTGTGTC |                                                                    |
| MbSUS        | Nub-CEPR2 F                   | acaagttgtacaaaaaagcaggctctccaaccaccATGTGCGAGAAGACCAGACCT           |
|              | Nub-CEPR2 R                   | tccgccaccaccaaccactttgtacaagaaagctgggtaCTATACTGTAATCTTTCCAGTTGTGTC |
|              | Cub-CEPR2 F                   | acaagttgtacaaaaaagcaggctctccaaccaccATGTGCGAGAAGACCAGACCT           |
|              | Cub-CEPR2 R                   | tccgccaccaccaaccactttgtacaagaaagctgggtaTACTGTAATCTTTCCAGTTGTGTC    |
|              | Nub-PYR1 F                    | acaagttgtacaaaaaagcaggctctccaaccaccATGCCTTCGGAGTTAACACCAG          |
|              | Nub-PYR1 R                    | tccgccaccaccaaccactttgtacaagaaagctgggtaTCACGTCACCTGAGAACCAC        |
|              | Nub-PYL1 F                    | acaagttgtacaaaaaagcaggctctccaaccaccATGGCGAATTCAGAGCTC              |
|              | Nub-PYL1 R                    | tccgccaccaccaaccactttgtacaagaaagctgggtaTTACCTAACCTGAGAAGAGT        |
|              | Nub-PYL2 F                    | acaagttgtacaaaaaagcaggctctccaaccaccATGAGCTCATCCCCGGCC              |
|              | Nub-PYL2 R                    | tccgccaccaccaaccactttgtacaagaaagctgggtaTTATTCATCATCATGCATAGGTGCAGA |
|              | Nub-PYL3 F                    | acaagttgtacaaaaaagcaggctctccaaccaccATGAATCTTGCTCCAATCCATGA         |
|              | Nub-PYL3 R                    | tccgccaccaccaaccactttgtacaagaaagctgggtaTCAGTTCGGAGAGGCCCT          |
|              | Nub-PYL4 F                    | acaagttgtacaaaaaagcaggctctccaaccaccATGCTTGCCGTTACCCTG              |
|              | Nub-PYL4 R                    | tccgccaccaccaaccactttgtacaagaaagctgggtaTCACAGAGACATCTTCTTCT        |
|              | Nub-PYL5 F                    | acaagttgtacaaaaaagcaggctctccaaccaccATGAGGTCACCGGTGCAAC             |
|              | Nub-PYL5 R                    | tccgccaccaccaaccactttgtacaagaaagctgggtaTTATTGCCGTTGGTACTTC         |
|              | Nub-PYL6 F                    | acaagttgtacaaaaaagcaggctctccaaccaccATGCCAACGTCGATACAGTTTCA         |
|              | Nub-PYL6 R                    | tccgccaccaccaaccactttgtacaagaaagctgggtaTTACGAGAATTTAGAAGTGTCTCG    |
|              | Nub-PYL7 F                    | acaagttgtacaaaaaagcaggctctccaaccaccATGGAGATGATCGGAGGAGA            |
|              | Nub-PYL7 R                    | tccgccaccaccaaccactttgtacaagaaagctgggtaTCAAAGGTTGGTTTCTGTATGATTC   |
|              | Nub-PYL8 F                    | acaagttgtacaaaaaagcaggctctccaaccaccATGGAAAGCTAACGGGATTGA           |
|              | Nub-PYL8 R                    | tccgccaccaccaaccactttgtacaagaaagctgggtaTTAGACTCTCGATCTGTGC         |
|              | Nub-PYL9 F                    | acaagttgtacaaaaaagcaggctctccaaccaccATGATGGACGGCGTTGAA              |
|              | Nub-PYL9 R                    | tccgccaccaccaaccactttgtacaagaaagctgggtaTCACTGAGTAATGTCTGTGAG       |
|              | Nub-PYL10 F                   | acaagttgtacaaaaaagcaggctctccaaccaccATGAACGGTGACGAACAACAAAGAA       |
|              | Nub-PYL10 R                   | tccgccaccaccaaccactttgtacaagaaagctgggtaTCATATCTTCTTCCATAGATTCTGC   |
|              | Nub-PYL11 F                   | acaagttgtacaaaaaagcaggctctccaaccaccATGGAAACTTCTCAAAAATATCA         |
|              | Nub-PYL11 R                   | tccgccaccaccaaccactttgtacaagaaagctgggtaTTACAACCTTAGATGAGCCA        |
|              | Nub-PYL12 F                   | acaagttgtacaaaaaagcaggctctccaaccaccATGAAAACATCTCAAGAAGACAGC        |
|              | Nub-PYL12 R                   | tccgccaccaccaaccactttgtacaagaaagctgggtaTTAAGTGAGCTCCATCATCT        |
|              | Nub-PYL13 F                   | acaagttgtacaaaaaagcaggctctccaaccaccATGGAAAGTTCTAAGCAAAAACG         |
|              | Nub-PYL13 R                   | tccgccaccaccaaccactttgtacaagaaagctgggtaTTACTTCATCATTTTTCTTTGTGAGC  |
|              | Nub-ABI1 F                    | ACAAGTTGTACAAAAAAGCAGGCTCTCCAACCACCATGGAGGAAGTATCTCCGG             |
|              | Nub-ABI1 R                    | TCCGCCACCACCAACCCTTTGTACAAGAAAGCTGGGTATCAGTTCAAGGTTTGTCTCT         |
|              | Nub-ABI2 F                    | ACAAGTTGTACAAAAAAGCAGGCTCTCCAACCACCATGGACGAAGTTTCTCCTG             |
|              | Nub-ABI2 R                    | TCCGCCACCACCAACCCTTTGTACAAGAAAGCTGGGTATCAATTCAAGGATTGTCTCT         |

|       |                           |                                                                   |
|-------|---------------------------|-------------------------------------------------------------------|
|       | Nub-SnRk2.2 F             | ACAAGTTTGTACAAAAAAGCAGGCTCTCCAACCACCATGGATCCGGCGACTAATTC          |
|       | Nub-SnRk2.2 R             | TCCGCCACCACCAACCCTTTGTACAAGAAAGCTGGGTATCAGAGAGCATAAACTATCTCTCC    |
|       | Nub-SnRk2.3 F             | ACAAGTTTGTACAAAAAAGCAGGCTCTCCAACCACCATGGATCGAGCTCCGGTGA           |
|       | Nub-SnRk2.3 R             | TCCGCCACCACCAACCCTTTGTACAAGAAAGCTGGGTATTAGAGAGCAGCTAAACTATCTCTCCG |
|       | Nub-SnRk2.6 F             | ACAAGTTTGTACAAAAAAGCAGGCTCTCCAACCACCATGGATCGAGCAGCACT             |
|       | Nub-SnRk2.6 R             | TCCGCCACCACCAACCCTTTGTACAAGAAAGCTGGGTATCACATTGCGTACACAATCT        |
|       | Nub-ABI4 F                | ACAAGTTTGTACAAAAAAGCAGGCTCTCCAACCACCATGGACCCTTTAGCTTCCCA          |
|       | Nub-ABI4 R                | TCCGCCACCACCAACCCTTTGTACAAGAAAGCTGGGTATTAATAGAAATCCCCAAGATGGG     |
|       | Nub-ABI5 F                | ACAAGTTTGTACAAAAAAGCAGGCTCTCCAACCACCATGGTAAGTAGAGAAACGAAG         |
|       | Nub-ABI5 R                | TCCGCCACCACCAACCCTTTGTACAAGAAAGCTGGGTATTAGAGTGGACAACCTCGG         |
|       | Nub-CAR1 F                | acaagtttgtacaaaaaagcaggctctccaaccaccATGGAGAATCTTGTAGTCTTCTTCG     |
|       | Nub-CAR1 R                | tccgccaccaccaacccttgtacaagaaagctgggtaCTAAATACCCCTTGAACCCGG        |
|       | Nub-CAR2 F                | acaagtttgtacaaaaaagcaggctctccaaccaccATGGAGAATATGTTAGTCTTCTAAG     |
|       | Nub-CAR2 R                | tccgccaccaccaacccttgtacaagaaagctgggtaCTAGAAAGCAACATCTCCG          |
|       | Nub-CAR3 F                | acaagtttgtacaaaaaagcaggctctccaaccaccATGTCGTTATGGATAATCTGTTAGGTATC |
|       | Nub-CAR3 R                | tccgccaccaccaacccttgtacaagaaagctgggtaTTACAAGCCTTTAGAACCAGGGAA     |
|       | Nub-CAR4 F                | acaagtttgtacaaaaaagcaggctctccaaccaccATGACAACGGCGTGTCCG            |
|       | Nub-CAR4 R                | tccgccaccaccaacccttgtacaagaaagctgggtaTCATAGACCCTTGGAGCCAG         |
|       | Nub-CAR5 F                | acaagtttgtacaaaaaagcaggctctccaaccaccATGATCGTTTCATTTCTCTATTTTCTTC  |
|       | Nub-CAR5 R                | tccgccaccaccaacccttgtacaagaaagctgggtaTCATAGACCCTTCCGGAA           |
|       | Nub-CAR6 F                | acaagtttgtacaaaaaagcaggctctccaaccaccATGGAGAAAACAGAGGAAGAGG        |
|       | Nub-CAR6 R                | tccgccaccaccaacccttgtacaagaaagctgggtaTCAGAGTCCACTACCACCTG         |
|       | Nub-CAR7 F                | acaagtttgtacaaaaaagcaggctctccaaccaccATGGAGGAACCTGTAGGGCTTC        |
|       | Nub-CAR7 R                | tccgccaccaccaacccttgtacaagaaagctgggtaTCAAAGCCCTCTAGAACCTGG        |
|       | Nub-CAR8 F                | acaagtttgtacaaaaaagcaggctctccaaccaccATGGAGAATCTGGTGGACT           |
|       | Nub-CAR8 R                | tccgccaccaccaacccttgtacaagaaagctgggtaTCAAAAATCGCTTGAACCAGTAAC     |
|       | Nub-CAR9 F                | acaagtttgtacaaaaaagcaggctctccaaccaccATGGAGATAAACCATTAGGGATTCTC    |
|       | Nub-CAR9 R                | tccgccaccaccaacccttgtacaagaaagctgggtaTTAGTCCAATCGTTTTGTCCGGC      |
|       | Nub-CAR10 F               | acaagtttgtacaaaaaagcaggctctccaaccaccATGGATCAAAGCCCTTGGATTGC       |
|       | Nub-CAR10 R               | tccgccaccaccaacccttgtacaagaaagctgggtaTTAGGTAGAGGAAGGCCTCCA        |
|       | Nub-PYL1-1~131aa F        | acaagtttgtacaaaaaagcaggctctccaaccaccATGGCGAATTCAGAGTCCCTC         |
|       | Nub-PYL1-1~131aa R        | tccgccaccaccaacccttgtacaagaaagctgggtaTCTCCGATCATCGTCCAA           |
|       | Nub-PYL1-1~167aa F        | acaagtttgtacaaaaaagcaggctctccaaccaccATGGCGAATTCAGAGTCCCTC         |
|       | Nub-PYL1-1~167aa R        | tccgccaccaccaacccttgtacaagaaagctgggtaGGTCCAGATCTTCTTCTT           |
|       | Nub-PYL1-125~221aa F      | acaagtttgtacaaaaaagcaggctctccaaccaccATGCTGTTGGACGATGCGGA          |
|       | Nub-PYL1-125~221aa R      | tccgccaccaccaacccttgtacaagaaagctgggtaTTACCTAACCTGAGAAGAGTTGTTG    |
|       | Nub-PYL1-46~221aa F       | acaagtttgtacaaaaaagcaggctctccaaccaccATGGAGTTCACACGTACCAACT        |
|       | Nub-PYL1-46~221aa R       | tccgccaccaccaacccttgtacaagaaagctgggtaTTACCTAACCTGAGAAGAGTTGTTG    |
| MbSUS | Nub-PYL2-1~104 aa F       | acaagtttgtacaaaaaagcaggctctccaaccaccATGAGCTCATCCCCGGCC            |
|       | Nub-PYL2-1~104 aa R       | tccgccaccaccaacccttgtacaagaaagctgggtaATCGACGAATCTAAGCCGCT         |
|       | Nub-PYL2-49~190 aa F      | acaagtttgtacaaaaaagcaggctctccaaccaccATGGTGGTTTGGCCTTATCCG         |
|       | Nub-PYL2-49~190 aa R      | tccgccaccaccaacccttgtacaagaaagctgggtaTTATTTCATCATGATAGGTGCAGA     |
|       | Nub-PYL2-84~190 aa F      | acaagtttgtacaaaaaagcaggctctccaaccaccATGGAGTGACCGTAATCTCCGG        |
|       | Nub-PYL2-84~190 aa R      | tccgccaccaccaacccttgtacaagaaagctgggtaTTATTTCATCATGATAGGTGCAGA     |
|       | Nub-PYL4-1~78 aa F        | acaagtttgtacaaaaaagcaggctctccaaccaccATGCTTGCCGTTACCTG             |
|       | Nub-PYL4-1~78 aa R        | tccgccaccaccaacccttgtacaagaaagctgggtaTTGTGGTTATCAAAGCGGC          |
|       | Nub-PYL4-1~163 aa F       | acaagtttgtacaaaaaagcaggctctccaaccaccATGCTTGCCGTTACCCGT            |
|       | Nub-PYL4-1~163 aa R       | tccgccaccaccaacccttgtacaagaaagctgggtaGACGTAAGACTCGACACGA          |
|       | Nub-PYL4-52~207 aa F      | acaagtttgtacaaaaaagcaggctctccaaccaccATGTGTTGCTCCGCCGTTATTCA       |
|       | Nub-PYL4-52~207 aa R      | tccgccaccaccaacccttgtacaagaaagctgggtaTCACAGAGACATCTTCTTCTGC       |
|       | Nub-PYL4-18~207aa F       | acaagtttgtacaaaaaagcaggctctccaaccaccATGCAGATCCGATGATGATCGC        |
|       | Nub-PYL4-18~207 aa R      | tccgccaccaccaacccttgtacaagaaagctgggtaTCACAGAGACATCTTCTTCTGC       |
|       | Nub-CAR2-1-100 aa F       | acaagtttgtacaaaaaagcaggctctccaaccaccATGGAGAATATGTTAGTCTTCT        |
|       | Nub-CAR2-1-100 aa R       | tccgccaccaccaacccttgtacaagaaagctgggtaTTGGATTCTGATGGCTCAA          |
|       | Nub-CAR2-74-174 aa F      | acaagtttgtacaaaaaagcaggctctccaaccaccATGGACAGGTTCTCAAGGGATGA       |
|       | Nub-CAR2-74-174 aa R      | tccgccaccaccaacccttgtacaagaaagctgggtaCTAGAAAGCAACATCTCCCG         |
|       | Nub-CAR7-1-100 aa F       | acaagtttgtacaaaaaagcaggctctccaaccaccATGGAGGAACCTGTAGGGCT          |
|       | Nub-CAR7-1-100 aa R       | tccgccaccaccaacccttgtacaagaaagctgggtaACCCATTTTGTGAACCTCCA         |
|       | Nub-CAR7-74-165 aa F      | acaagtttgtacaaaaaagcaggctctccaaccaccATGCCCGATGAACCTGTGAATCT       |
|       | Nub-CAR7-74-165aa R       | tccgccaccaccaacccttgtacaagaaagctgggtaTCAAAGCCCTCTAGAACCTG         |
|       | Nub-CAR8-1-100 aa F       | acaagtttgtacaaaaaagcaggctctccaaccaccATGGAGAATCTGGTGGGAC           |
|       | Nub-CAR8-1-100 aa R       | tccgccaccaccaacccttgtacaagaaagctgggtaATCCGTTCTTGAACCTCG           |
|       | Nub-CAR8-74-165 aa F      | acaagtttgtacaaaaaagcaggctctccaaccaccATGCATGTGACTCTCGAAGTGA        |
|       | Nub-CAR8-74-165 aa R      | tccgccaccaccaacccttgtacaagaaagctgggtaTCAAAAATCGCTTGAACCCG         |
|       | Cub-CEPR2-LRR 200 - 621 F | acaagtttgtacaaaaaagcaggctctccaaccaccATGTTAGCTGCCCTCAACTTGACC      |
|       | Cub-CEPR2-LRR 200 - 621 R | tccgccaccaccaacccttgtacaagaaagctgggtaTACTGTAATCTTCCAGTTGTGTC      |
|       | Cub-CEPR2-LRR 400 - 621 F | acaagtttgtacaaaaaagcaggctctccaaccaccATGCAAGTTGTTGAAGGATTCTGGTCT   |
|       | Cub-CEPR2-LRR 400 - 621 R | tccgccaccaccaacccttgtacaagaaagctgggtaTACTGTAATCTTCCAGTTGTGTC      |
|       | Cub-CEPR2-LRR 600 - 621 F | acaagtttgtacaaaaaagcaggctctccaaccaccATGTTGGGGTGGATTTTGCAGT        |
|       | Cub-CEPR2-LRR 600 - 621 R | tccgccaccaccaacccttgtacaagaaagctgggtaTACTGTAATCTTCCAGTTGTGTC      |
|       | Cub-CEPR2-KD 642-650 aa F | acaagtttgtacaaaaaagcaggctctccaaccaccATGTCGAGAAGACCAGACCTC         |
|       | Cub-CEPR2-KD 642-650 aa R | tccgccaccaccaacccttgtacaagaaagctgggtaACGTATCTTCACAACTCTGTAACCG    |
|       | Cub-CEPR2-KD 642-717 aa F | acaagtttgtacaaaaaagcaggctctccaaccaccATGTCGAGAAGACCAGACCTC         |
|       | Cub-CEPR2-KD 642-717 aa R | tccgccaccaccaacccttgtacaagaaagctgggtaCTTCAACCCTTAACCCGCA          |
|       | Cub-CEPR2-KD 642-802 aa F | acaagtttgtacaaaaaagcaggctctccaaccaccATGTCGAGAAGACCAGACCTC         |
|       | Cub-CEPR2-KD 642-802 aa R | tccgccaccaccaacccttgtacaagaaagctgggtaTGCATTCTTTCCAGTTGTGTC        |
|       | Cub-CEPR2-KD 642-896 aa F | acaagtttgtacaaaaaagcaggctctccaaccaccATGTCGAGAAGACCAGACCTC         |
|       | Cub-CEPR2-KD 642-896 aa R | tccgccaccaccaacccttgtacaagaaagctgggtaCTCTCAAACCTCGTCTTCCA         |

|                                                   |                             |                                    |
|---------------------------------------------------|-----------------------------|------------------------------------|
| Deletion analysis<br>for LCI assay                | cLUC-PYL1-1~131aa F         | GGTACCATGGCGAATTCAGAGTCTCTC        |
|                                                   | cLUC-PYL1-1~131aa R         | GTCGACTTATCTCCGATCATCGTCCAA        |
|                                                   | cLUC-PYL1-1~167aa F         | GGTACCATGGCGAATTCAGAGTCTCTC        |
|                                                   | cLUC-PYL1-1~167aa R         | GTCGACTTAGGTCCAGATCCTTTCTTC        |
|                                                   | cLUC-PYL1-125~221aa F       | GGTACCATGCTGTTGGACGATGATCG         |
|                                                   | cLUC-PYL1-125~221aa R       | GTCGACTTACCTAACCTGAGAAGAGTTGTTG    |
|                                                   | cLUC-PYL1-46~221aa F        | GGTACCATGGAGTTCCACACGTACCAAC       |
|                                                   | cLUC-PYL1-46~221aa R        | GTCGACTTACCTAACCTGAGAAGAGTTGTTG    |
|                                                   | cLUC-PYL2-1~104 aa F        | GGTACCATGAGCTCATCCCCGCC            |
|                                                   | cLUC-PYL2-1~104 aa R        | GTCGACTTAATCGACGAACTCAAGCCGCTC     |
|                                                   | cLUC-PYL2-49~190 aa F       | GGTACCATGGTGGTTTGGCCTTTATCCG       |
|                                                   | cLUC-PYL2-49~190 aa R       | GTCGACTTATTCATCATCATGCATAGGTGCAGA  |
|                                                   | cLUC-PYL2-84~190 aa F       | GGTACCATGGAAGTGACCCTAATCTCCGG      |
|                                                   | cLUC-PYL2-84~190 aa R       | GTCGACTTATTCATCATCATGCATAGGTGCAGA  |
|                                                   | cLUC-PYL4-1~78 aa F         | GGTACCATGCTTGGCCTTACCCTC           |
|                                                   | cLUC-PYL4-1~78 aa R         | GTCGACTCATTGTGGTTTATCAAAGCGGC      |
|                                                   | cLUC-PYL4-1~163 aa F        | GGTACCATGCTTGGCCTTACCCTC           |
|                                                   | cLUC-PYL4-1~163 aa R        | GTCGACTCAGACGTAAGACTCGACAACGA      |
|                                                   | cLUC-PYL4-52~207 aa F       | GGTACCATGTGTTGCTCCGCGTTATTCA       |
|                                                   | cLUC-PYL4-52~207 aa R       | GTCGACTCACAGAGACATCTTCTTCTTGCTC    |
|                                                   | cLUC-PYL4-18~207aa F        | GGTACCATGCAGATCCGATGATGATCGC       |
|                                                   | cLUC-PYL4-18~207 aa R       | GTCGACTCACAGAGACATCTTCTTCTTGCTC    |
|                                                   | nLUC-CEPR2-LRR 200 - 621 F  | GGTACCATGTTAGCTCGCTCCAACCTGACC     |
|                                                   | nLUC-CEPR2-LRR 200 - 621 R  | GTCGACTACTGTAATCTTTCCAGTTGTGTC     |
|                                                   | nLUC-CEPR2-LRR 400 - 621 F  | GGTACCATGCAAGTTGTTGAAGGATTCTGGTCT  |
|                                                   | nLUC-CEPR2-LRR 400 - 621 R  | GTCGACTACTGTAATCTTTCCAGTTGTGTC     |
|                                                   | nLUC-CEPR2-LRR 600 - 621 F  | GGTACCATGTTGGGGTTGAGTATTTGCAGT     |
|                                                   | nLUC-CEPR2-LRR 600 - 621 R  | GTCGACTACTGTAATCTTTCCAGTTGTGTC     |
|                                                   | nLUC-CEPR2-KD 642-650 aa F  | GGTACCATGTCGAGAAGACCAGACCTC        |
|                                                   | nLUC-CEPR2-KD 642-650 aa R  | GTCGACACGTATCTTCAAACTCTGTAACGC     |
| nLUC-CEPR2-KD 642-717 aa F                        | GGTACCATGTCGAGAAGACCAGACCTC |                                    |
| nLUC-CEPR2-KD 642-717 aa R                        | GTCGACCTTCAACCACCTAACCGCCA  |                                    |
| nLUC-CEPR2-KD 642-802 aa F                        | GGTACCATGTCGAGAAGACCAGACCTC |                                    |
| nLUC-CEPR2-KD 642-802 aa R                        | GTCGACTGCGATTCTTTTGCCGCT    |                                    |
| nLUC-CEPR2-KD 642-896 aa F                        | GGTACCATGTCGAGAAGACCAGACCTC |                                    |
| nLUC-CEPR2-KD 642-896 aa R                        | GTCGACCTTCAAACTCGTCTTCCA    |                                    |
| Pull down and<br><i>in vitro</i> kinase<br>assays | CEPR2-pET30a F              | GGATCCCGTTACAGAGTTGTGAAGATACGT     |
|                                                   | CEPR2-pET30a R              | GTCGACTACTGTAATCTTTCCAGTTGTGTC     |
|                                                   | PYL2-pGEX 4t-1 F            | GGATCCATGAGCTCATCCCCGCC            |
|                                                   | PYL2-pGEX 4t-1 R            | GAATTCATTATTCATCATCATGCATAGGTGCAGA |
|                                                   | PYL4-pGEX 4t-1 F            | GGATCCATGCTTGGCCTTACCCTC           |
|                                                   | PYL4-pGEX 4t-1 R            | GAATTCACAGAGACATCTTCTTCTTGCTC      |
| T-DNA                                             | <i>cepr2</i> LP             | TCACAACTGTAAACGCAACG               |
|                                                   | <i>cepr2</i> RP             | AACTCGGAGTTTTGAAGGAGC              |
|                                                   | <i>pxy</i> LP               | AATCTCGATTCTGCAACATC               |
|                                                   | <i>pxy</i> RP               | GTTTCGGAGTCAAACAATCG               |
|                                                   | <i>pxl2</i> LP              | TCGAACGAATCAGTTTATCGG              |
|                                                   | <i>pxl2</i> RP              | AATGGCCTTGGAGATTAATGG              |
|                                                   | LB                          | TCAAACAGGATTTTCGCTGCT              |
| qRT<br>(60°C)                                     | qRT-ABI1 F                  | TCCATTATCCGTTGACCATA               |
|                                                   | qRT-ABI1 R                  | CATCTTCTTTTACTCTCTTCCACA           |
|                                                   | qRT-ABI2 F                  | AGATACCTTAAACCGTCAGT               |
|                                                   | qRT-ABI2 R                  | CGTTCTTCTTATGCCATAGTAA             |
|                                                   | qRT-PYL1 F                  | TAGATTTGAGAAAGAAGAAGAAGAA          |
|                                                   | qRT-PYL1 R                  | AGAGTTGTTGTTGTTGTTGT               |
|                                                   | qRT-PYL4 F                  | TCTAACTACCGATCCGTAAC               |
|                                                   | qRT-PYL4 R                  | GACATCTTCTTCTTGCTCTC               |
|                                                   | qRT-SnRK2.2 F               | TCAAGTCTTCTGTTCTTCATTCT            |
|                                                   | qRT-SnRK2.2 R               | GCTCCAACCAACATTACATAT              |
|                                                   | qRT-SnRK2.3 F               | AGTCTTCTGTTCTTCAATCAC              |
|                                                   | qRT-SnRK2.3 R               | GATAGTCTCTTGGCTCTTCT               |
|                                                   | qRT-SnRK2.6 F               | CTAATGAACGATAACACGATGA             |
|                                                   | qRT-SnRK2.6 R               | TCTCTAAGTCTTCTCCATATC              |
|                                                   | qRT-ABI4 F                  | CAACACCAACAGTATCAGAAT              |
|                                                   | qRT-ABI4 R                  | ACTATTATTATTACACCCTTCC             |
|                                                   | qRT-ABI5 F                  | GTAGTAGTAGTAGTAATGGACAGA           |
|                                                   | qRT-ABI5 R                  | CGGGTTTGGATTAGGTTTAG               |
|                                                   | qRT-RAB18 F                 | GCAGCAGTATGACGAGTA                 |
|                                                   | qRT-RAB18 R                 | AGTTCCAAAGCCTTCAGT                 |
| qRT-LUC F                                         | CAGGTATCAGGCAAGGATAT        |                                    |
| qRT-LUC R                                         | TAATCATAGGACCTCTCACAC       |                                    |

|    |                    |                            |
|----|--------------------|----------------------------|
| RT | RT-CEPR2 F         | ACAATTCTTGCTCGCCTTGCAGA    |
|    | RT-CEPR2 R         | GGATTTACCTGTTAGCCTATTCCCT  |
|    | RT-PXL2 F          | CATGATCGGAATGGGAGCAACC     |
|    | RT-PXL2 R          | CGGCGACCATTGAAACGGTT       |
|    | RT-PXY F           | CTCTCAACCAATTTCTTCCACAGGA  |
|    | RT-PXY R           | CAATATCCAAACAATAGCTCCGGCTG |
|    | RT-EF-1 $\alpha$ F | gtatggtgttaccttgctcccacag  |
|    | RT-EF-1 $\alpha$ R | catcattggcacccttctcactgc   |
